# Supplementary material for: METTL9 mediated N1-histidine methylation of zinc transporters is required for tumor growth
Source: PubMed Central journal article supplement (PMC8674392; doi:10.1007/s13238-021-00857-4), 2021-07-04

## Supplemental figure legends

### Figure S1. *Mettl9* is required for cell proliferation and tumor growth.

(A) The scheme of constructing *Mettl9* knockout cell line. CRISPR/Cas9 is used to remove exon 2 and 3 and exon 4 of *Mettl9*. (B, C) Validation of the efficiency of *Mettl9* knockout by measurement of mRNA and protein expression. (D) Knockout of *Mettl9* in MC38 tumor cells decreases cell growth measured by CCK-8 assay. (E-H) WT and *Mettl9* KO RM-1 tumor cells were injected into C57B6/J mouse (n=5). Tumor infiltrating immune cells from WT and *Mettl9* KO tumor-bearing C57B6/J mice were examined by flow cytometry. (E, F) The cell numbers per tumor weight and the percentages of tumor-infiltrating CD45<sup>+</sup> cells within all live cells from the tumor were quantified. Each dot represents one mouse. n=5. (G, H) Tumor-infiltrating CD4<sup>+</sup> and CD8<sup>+</sup> T cells were quantified as the percentages within total CD45<sup>+</sup> cells. Each dot represents one mouse. n=5. For all panels, \*:  $P < 0.05$ ; \*\*:  $P < 0.01$ ; \*\*\*:  $P < 0.001$ ; \*\*\*\*:  $P < 0.0001$ . Error bars represent S.D. Data are representative of three independent experiments.

### Figure S2. METTL9 is a conservative 7-beta Strand methyltransferase.

(A) Alignment of the core methyltransferase domain of METTL9 orthologues. Homo Sapiens (Hs; NP\_057109.3), Mus musculus (Mm; NP\_067529.2), Thamnophis elegans (Te; XP\_032087096.1), Xenopus tropicalis (Xt; NP\_001007899.1), Danio rerio (Dr; NP\_001070810.1), Ostreococcus tauri (Ot; XP\_003078360.1). Blue star, mutant at predicted motifs. Red star, mutant at predicted active sites.

### Figure S3. METTL9 methylates Zn<sup>2+</sup> transporter SLC39A7.

(A) Fluorography showing histone was not methylated by METTL9. GST-SDG714C as a positive control. (B) Immunofluorescence localization analysis of *Mettl9*-GFP fusion protein in B16F10 cell (exogenous) and *Mettl9*-flag fusion protein in RM-1 *Mettl9*-3×flag knock-in cells (endogenous). Scale bar, 10 μm. (C) The scheme of constructing flag-tag knock-in RM-1 tumor cell line and the experimental workflow. (D) The METTL9 binding proteins. Dotplot of METTL9-interacting proteins by immunoprecipitation–mass spectrometry (IP–MS) analysis. Colored indicates enriched proteins compared to control (PSMs > 2; log<sub>2</sub>(Sum PEP Score) > 2). (E, F) Fine mapping of the METTL9-methylated regions in SLC39A7. The diagram shows different recombinant GST-SLC39A7 (Termed A7) truncates. The methylated peptide was colored in red. (G, H) LC-MS/MS fragmentation spectra analysis of METTL9 methylated peptide SLC39A7(66-78) and SLC39A7(95-107). The monomethylation residues at His73, His75, His101 and His103 were colored in green.

**Figure S4. The key sites of METTL9 enzymatic activity**

(A) Fluorography showing recombinant histone 3 with 6×His tag was methylated by METTL9. GST-SDG714C as a positive control. Ponceau S-stained membrane as loading control (bottom). (B) *In vitro* activity of WT and mutated METTL9 on recombinant 6×His-histone H3. D151A, G153R, G155R, in motif-I; D204A, in motif-II; L175A, I180A, G266R, predicted active sites. The data are representative of three independent experiments

**Figure S5. METTL9 methylates xHxH motif on zinc transporters.**

(A) *In vitro* activity of METTL9 on recombinant GST-S100A9, GST-ZnT2 and GST-NDUB3 with GHxH motif. GST as a control substrate. (B) LC-MS/MS fragmentation spectra analysis of HA-SLC39A7 overexpressed in cells. The monomethylation residue at His256 was colored in green. (C) GO analysis of top pathways from proteins enriched with GHA/C/G/SH motif. (D) Evolutionary tree enrichment of proteins containing GHA/C/G/SH motif of ZnT (SLC30s) and ZIP (SLC39s) family.

**Figure S6. *Mettl9* and *Slc39a7* regulates common downstream pathways**

(A-H) Gene set enrichment analysis (GSEA) of differentially expressed genes in *Mettl9* KO cell or *Slc39a7* KD cells. Significant KEGG pathways with an enrichment score > 0.4 and p-value <0.01 were identified. Transcripts downregulated in *Mettl9* KO cell or *Slc39a7* KD cell versus their controls significantly enriched in (A, E) Cell cycle, (B, F) DNA replication, (C, G) Homologous recombination and (D, H) Ribosome biogenesis in eukaryotes.

**Figure S7. SLC39A7 mutants affect the zinc level in *Mettl9* KO cells.**

(A) Fluorescence images of FluoZin-3 (2 μM, 1 h, 25 °C) stained the indicated groups of BFP-empty vector (EV), BFP-SLC39A7, BFP-SLC39A7 H206/218F mutants, BFP-SLC39A7 H256F mutants. Scale bar, 10 μm.

## Supplemental Methods

### Cell culture.

The RM-1, MC38, HEK239T cell line was purchased from American Type Culture Collection (ATCC, Manassas, VA, USA). All cell lines were cultured in high-glucose Dulbecco's modified Eagle's medium (H-DMEM; Gibco) supplemented with 10% fetal bovine serum (FBS; Gibco), 100 U/mL penicillin, and 100 ug/ml streptomycin. All cell lines were cultured at 37 °C with 5% CO<sub>2</sub>.

### Plasmid construction and Peptides.

*Slc39a7* (ZIP7) and its fragments and mutants were cloned into pGEX-6P-1. *Slc39a7* and its mutants were inserted into Plvx-IRES-BFP. *Slc39a7* were inserted into pcDNA 3.2 - 3'HA. *Mettl9* and its mutants were cloned into the pGEX-6P-1. *Mettl9* were inserted in pEGFP-N3. All the peptides were designed and inserted into pGEX-6P-1 by annealing. *S100a9*, *ZnT2* and *Ndub3* were cloned and inserted into pGEX-6P-1. 6×His Histone H3 was a gift from Yong Ding lab in USTC.

The following peptides were synthesized : SLC39A7(66-78): DFHHGHGHTHESI; SLC39A7(95-107): LHHGSHGHSHDS; SLC39A7(66-74): DFHHGHGHT; SLC39A7(66-74) H73(3-me): DFHHGHG(His(3-me))T; SLC39A7(66-74) H73(1-me): DFHHGHG(His(1-me))T.

### Generation of mouse *Mettl9* KO/KI cell lines.

The *Mettl9* gene was disrupted by the CRISPR-Cas9 method using four guide RNA targeted to introns of upstream (sgRNA1: 5'-AAAGATGATGATCGGCCTCA-3'; sgRNA2: 5'-GATGATGATCGGCCTCAGGG-3') of exon 2 and downstream (sgRNA3: 5'-AGCCATGTGTAGTATCACCG-3'; sgRNA4: 5'-TACAGCATTCTGTACGCCCC-3') of exon 4 in *Mettl9* were cloned into HP180 vector (A gift from Hui Yang lab). For the generation of RM-1 knock-in (KI) cells complemented with C-terminally 3×flag-tagged *Mettl9*, plasmids for *Mettl9*-flag donor (pUC19-*Mettl9*-3×flag) and guide RNA plasmids (sgRNA5: 5'-CTCAGACCAGTATAAACACG-3'; sgRNA6: 5'-TCTTCTGGAGGGTCGGTTGC-3') were co-transfected into cells. Two days after the transfection, GFP positive cells were sorted and single cells were seeded into 96 well plate. The clones were screened by genomic PCR. The flag KI clones were screened by genomic

PCR and confirmed by Western Blot using anti-flag antibody.

### **Western Blots and antibodies.**

Protein was extracted from the cells with IP buffer (25 mM Tris-HCl pH 7.4, 150 mM NaCl, 1 mM EDTA, 1% NP-40, 5% glycerol) and resolved on SDS-PAGE gels, then transferred to PVDF membranes. The primary antibodies against METTL9 (1:2000, ProteinTech) and  $\beta$ -actin (1:5000, ProteinTech) were used overnight at 4 °C, after washing the membranes was incubated with secondary antibody (1:5000, ProteinTech) for 40 minutes. The membrane was explored by using enhanced chemiluminescence kit (Biosharp) according to the manufacturer's instructions.

### **Real-time RT-PCR analysis.**

TRNzol (TIANGEN) was used to extract RNA from cells growing on tissue culture dishes. 500 ng RNA were used for following RT-PCR. The HiScript RT SuperMix kit (Vazyme) were used for generating cDNA according to the manufacturer's instructions. The qPCR was conducted in 384-well PCR microplates (Bio-Rad) in a CFX384 Real-Time System (Bio-Rad). Each well contained a total volume of 10  $\mu$ l, including 4.2  $\mu$ l cDNA (concentration  $\sim$ 2.5 ng/ $\mu$ l), 0.4  $\mu$ l primers (10  $\mu$ M), 5.0  $\mu$ l Fast SYBR Green Master Mix (SYBR premix EX Taq, TaKaRa). The fluorescence was measured at the end of each cycle. Measured data was analyzed using the comparative CT method ( $\Delta\Delta$ CT method). Mouse *Rpl13a* prime F: GGGCAGGTTCTGGTATTGGAT, R: GGCTCGGAAATGGTAGGGG; mouse *Mettl9* prime F: CTGGCAGCTCCAGAAGAAGA, R: CCACTTGCCACCTACGTTTT.

### **Cell proliferation and colony formation assay.**

Cell proliferation was quantified using the cell counting Kit-8 (CCK8; APExBIO) according to the manufacturer's instruction. Cells were seeded in 96-well plates in triplicate at an initial density of 2000 cells per well. After being cultured for 24, 48, 72, and 96 hours, CCK-8 solution in 10  $\mu$ l was added to each well, and cells were further incubated at 37 °C for 4 hours. Optical density (OD) value was measured spectrophotometrically at 450 nm wavelength.

Cells were plated in 6-well plates (10000 cells per well), and then cultured for 4 days. The overexpression cells were generated by infecting with BFP-Slc39a7 or mutants' virus. After 24 h, the BFP-positive cells were sorted by flow cytometry. For an assay of colony

formation, colonies were fixed with 4% paraformaldehyde for 20 minutes, stained with 0.1% crystal violet for 15 minutes, and then washed with phosphate-buffered saline (PBS) before measurement. The total colony area was measured by image J software. The relative area was calculated by total area divided by original cell number.

### **Tumor formation assay.**

The C57B6/J mice and BALB/c nude mice were feeding under specific pathogen-free conditions in the experimental animal department of USTC. For the *in vivo* tumor formation assays,  $1.5 \times 10^5$  RM-1 *Mettl9* KO cells (1#, 2#) or RM-1 wild type cells were subcutaneously injected into the C57B6/J mice (n = 5 for each group) and the BALB/c nude mouse (n = 6 for each group) at 8 weeks of age. After transplantation 8 days, the growth of the tumors was assessed every two days. The mice were sacrificed after a period of about 3 weeks, and the weights of subcutaneous tumors were measured.

### **Analysis of immune cell infiltrate in tumor microenvironment.**

Preparation of single-cell suspension of mouse tumor tissues by mechanical grinding and collagenase digestion. For flow cytometry analysis, after blocking, cells were stained with the following mAbs: anti-CD45, anti-CD4, anti-CD8a, all from Biolegend. Samples were run on a BD flow cytometer and analyzed with the Flowjo Analysis Software (Beckman Coulter, Pasadena, CA). Cell populations were defined as follows: CD45<sup>+</sup> CD4<sup>+</sup> CD8<sup>-</sup> (CD4<sup>+</sup> T cells); CD45<sup>+</sup> CD4<sup>-</sup> CD8<sup>+</sup> (CD8<sup>+</sup> T cells).

### **IP assay and Mass spectrometry.**

The 15 cm dish *Mettl9*-3×flag RM-1 cells extracts prepared with IP buffer (25 mM Tris-HCl pH 7.4, 150 mM NaCl, 1 mM EDTA, 1% NP-40, 5% glycerol) remain on the ice for 30 minutes. Lysates were cleared by centrifugation at 12000 rpm for 10 minutes and incubated with anti-flag (anti-flag M2 Affinity Gel, Sigma) antibodies agarose. after 4 hours beads were then collected, and then the mass spectrum was performed. To select the METTL9-interacting proteins, the PEMs and Sum PEP Score was utilized to do a dot plot and top proteins closest to the upper right corner (PSMs > 2; log<sub>2</sub>(Sum PEP Score) > 2) was selected. For synthetic peptides methylation detection, after methylated by METTL9, the sample were sent to MS detection.

### **Expression and purification of recombinant proteins.**

The appropriate pGEX-6P-1 constructs were transformed into the chemically competent BL21- Codon Plus (DE3)-RIPL (Agilent Technologies) E. coli strain. The bacteria were cultured until the OD reaching ~0.6, the mediums were transferred into 16 °C, 180 rpm incubator and protein expression was induced with 0.5 mM isopropyl  $\beta$ -D-1-thiogalactopyranoside (IPTG) followed by overnight growth. For GST-tagged proteins, bacteria were lysed in GST-Lysis Buffer (50 mM Tris-HCl, 600 mM NaCl, 1 mM EDTA, 1 mM DTT, 10 % Glycerol, Protease Inhibitor Cocktail, pH7.6) and then purified using GST-Sefinose(TM) Resin (BBI). GST-tagged proteins were eluted by 10 mM glutathione and GST was removed by enzyme ProScission.

### ***In vitro* methyltransferase assays.**

*In vitro* methyltransferase assays were performed using 30  $\mu$ l reaction buffer (50 mM Tris-HCl pH 7.8, 50 mM KCl, 5 mM MgCl<sub>2</sub>) with 1  $\mu$ l <sup>3</sup>H-AdoMet (Perkin Elmer, specific activity = 55-85 Ci/mMole , 0.55  $\mu$ Ci/ $\mu$ l) or 1 mM unlabeled AdoMet for MS analysis of samples. For methylation of cell extract, reactions contained 80  $\mu$ g substrates and 2  $\mu$ g METTL9. For methylation of recombinant GST-tag proteins and 6 $\times$ His Histone H3, reactions contained 2  $\mu$ g substrates and 2  $\mu$ g METTL9. Reactions were incubated at 37 °C for 1 h, and stopped by the addition of SDS-PAGE loading buffer. Proteins were separated by SDS-PAGE. For autoradiography analysis, the proteins were then transferred to PVDF membranes, stained with Ponceau S and exposed to XBT X-ray film (Carestream) for 30 days (cell extract) or 7 days (recombinant substrates). For methylation of synthetic peptides, reactions contained 5  $\mu$ g substrates and 2  $\mu$ g GST-METTL9 binding with GST-Sefinose (TM) Resin, GST-METTL9 was then removed by centrifugation. For autoradiography analysis, the peptides were directly loaded to NC membranes and exposed to XBT X-ray film (Carestream) for 7 days.

### **Fluorescence imaging of Zn<sup>2+</sup> level.**

Cells were cultured in the glass bottom micro-well dishes (Biosharp) for confocal microscopy imaging. Before ratiometric imaging with LSM 710 microscopy, 2  $\mu$ M FluoZin-3 AM (Invitrogen) was added to dishes to stain cells for 1 hour and then was washed twice with PBS. For overexpression, the cells in 10 cm dish were infected with Slc39a7 wildtype or mutants in Plvx-IRES-BFP virus. After 24 h, the BFP-positive cells were sorted by flow cytometry. After cultured in the glass bottom micro-well dishes for 24 hours, the cells were

stained using FluoZin-3 AM (2  $\mu$ M) for confocal microscopy imaging.

### **RNA-seq data processing and analysis.**

The RM-1 cells of  $1 \times 10^7$  WT and *Mettl9* KO were extracted with TRNzol (TIANGEN) for total RNA library preparation. The libraries are directly sequenced using next-generation sequencing technologies. After filtering, clean reads were mapped to the mouse reference genome. Mapping results were stored in BAM files. Total read counts at the gene level were summarized using feature-counts function in R environment, with the R package biomaRt for gene and transcript mapping. The differential expression genes were analyzed by DESeq2 with default settings using total read counts as input and the adjusted P value (p.adj) less than 0.05. Dotplot of differential genes of normalized expression matrix from DESeq2 analysis from GO pathway enrichment.

We performed gene set enrichment analysis (GSEA) using KEGG function of clusterProfiler package in RStudio. The RNA-seq data of non-targeting control (NC) and two individual *Slc39a7* siRNA in MDA-MB-231 cells are from the accession number GSE155437 from NCBI Gene Expression Omnibus (PMID: 33608508). Significant KEGG pathways with an enrichment score  $> 0.4$  and a p-value  $< 0.01$  were identified. The R package ggplot2 was applied to visualize the results.

### **TCGA and GTEx data analysis.**

We download the expression data of *METTL9* in PRAD, PAAD, LIHC combining GTEx normal sample from USCS Xena (<http://xena.ucsc.edu>), and make boxplot with significance difference index through ggplot in R environment.

We applied ESTIMATE computational method to calculate the immune score of different cancer samples from The Cancer Genome Atlas (TCGA) database. Correlation between several genes expression levels and immune scores were performed using the 'rcorr' function implemented in Hmisc R package v.4.5.0, adopting Pearson's correlation method. Significant correlations ( $P < 0.05$ ) were plotted using the pheatmap R package v.1.0.12. Genes with no notable correlation show a coefficient equal to zero.

### **Statistical analysis.**

All experimental operations were independently repeated for at least three times. Images was analyzed using Image J Software (National Institutes of Health, Bethesda, MD, USA). Statistical analysis was performed using GraphPad Prism Software 6 (GraphPad

Software, La Jolla, CA, USA). For data that had a normal distribution and homogeneity of variance, two-tailed Student's t test was performed to evaluate significant differences between two groups. P-values<0.05 were considered statistically significant.



SUPPLEMENTARY FIGURES

Figure S1

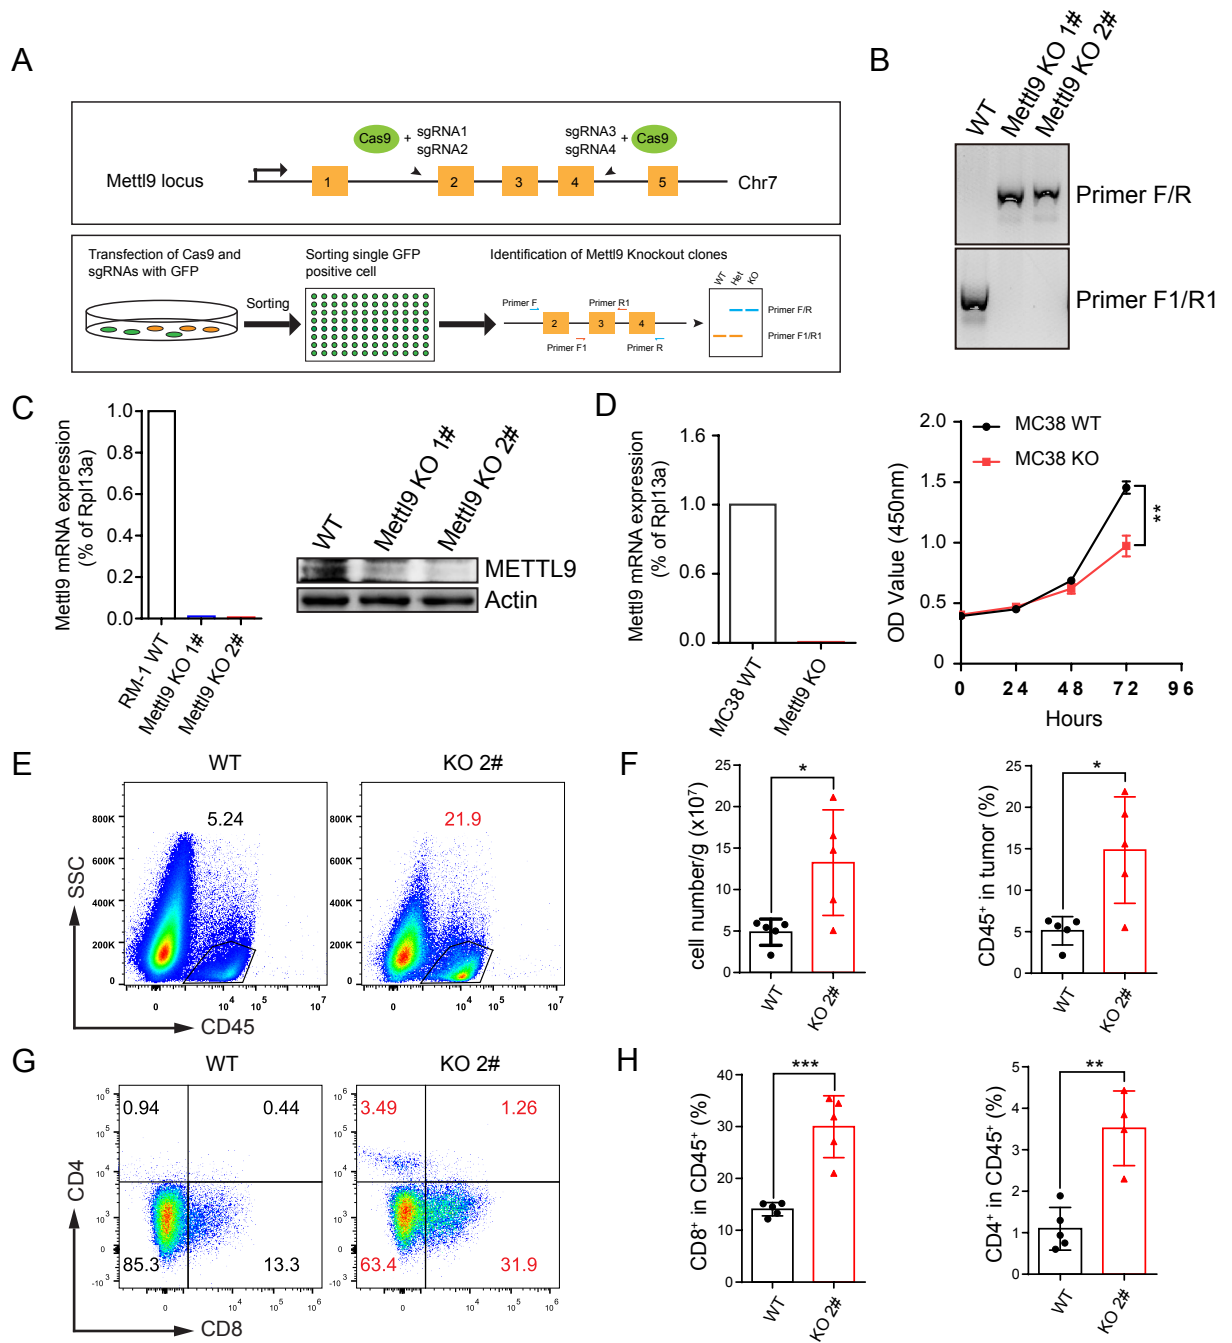

Figure S2

A

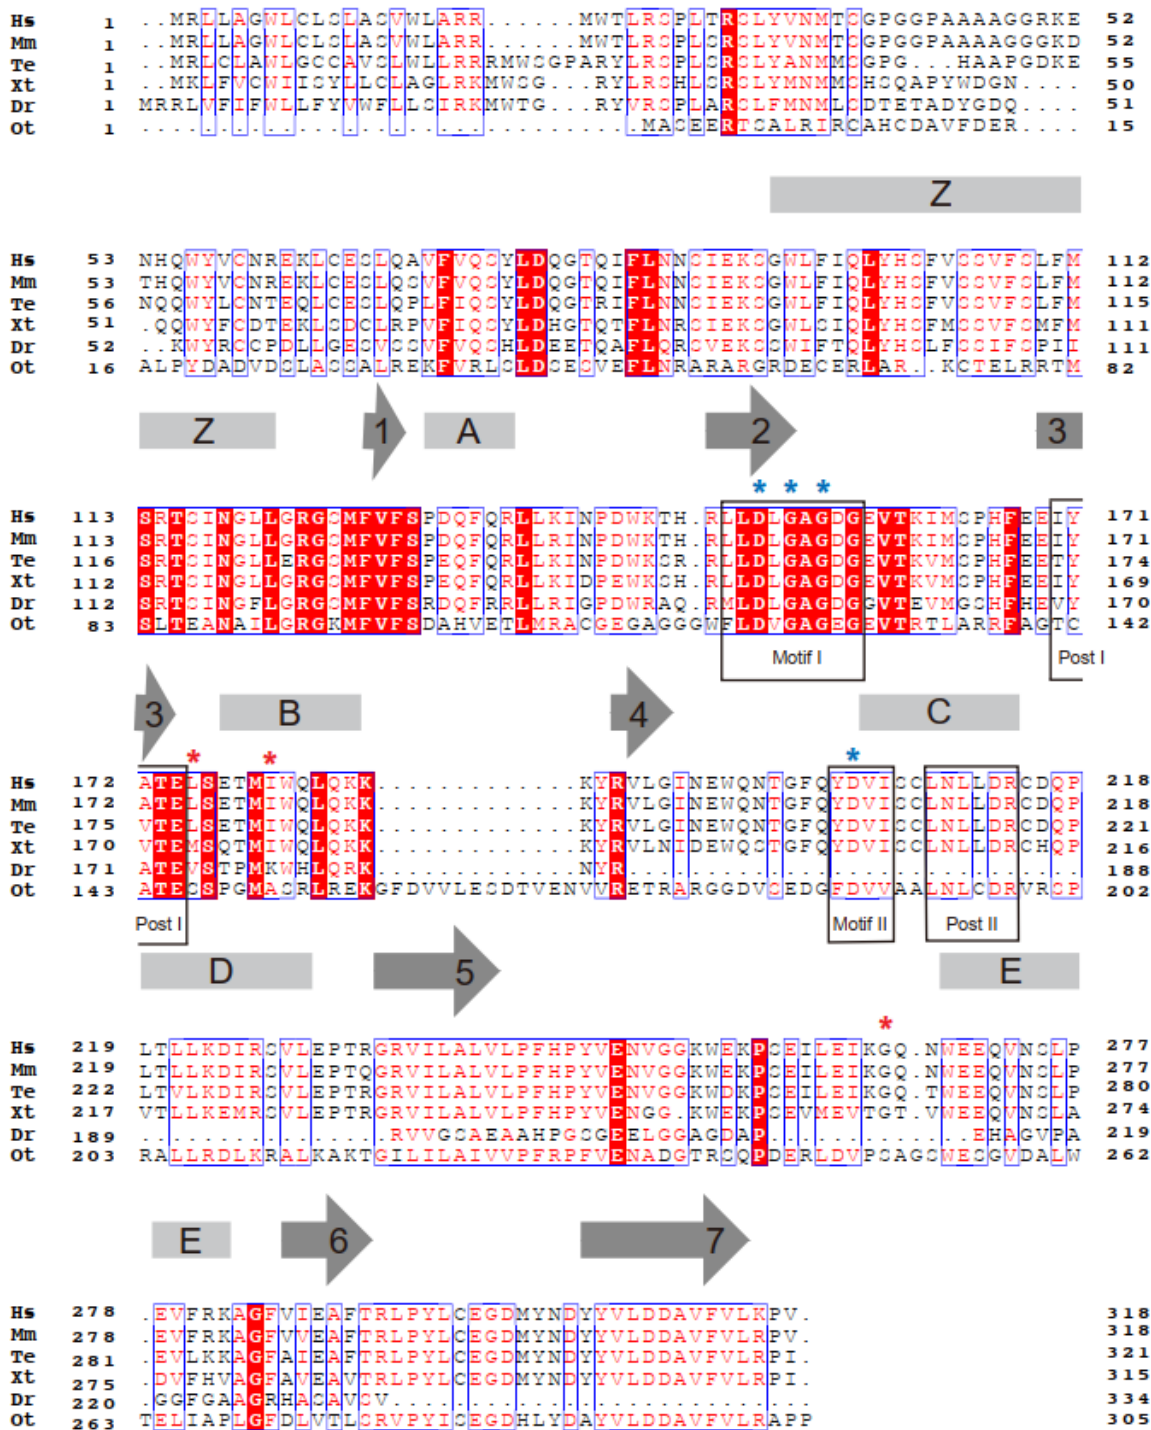

Figure S3

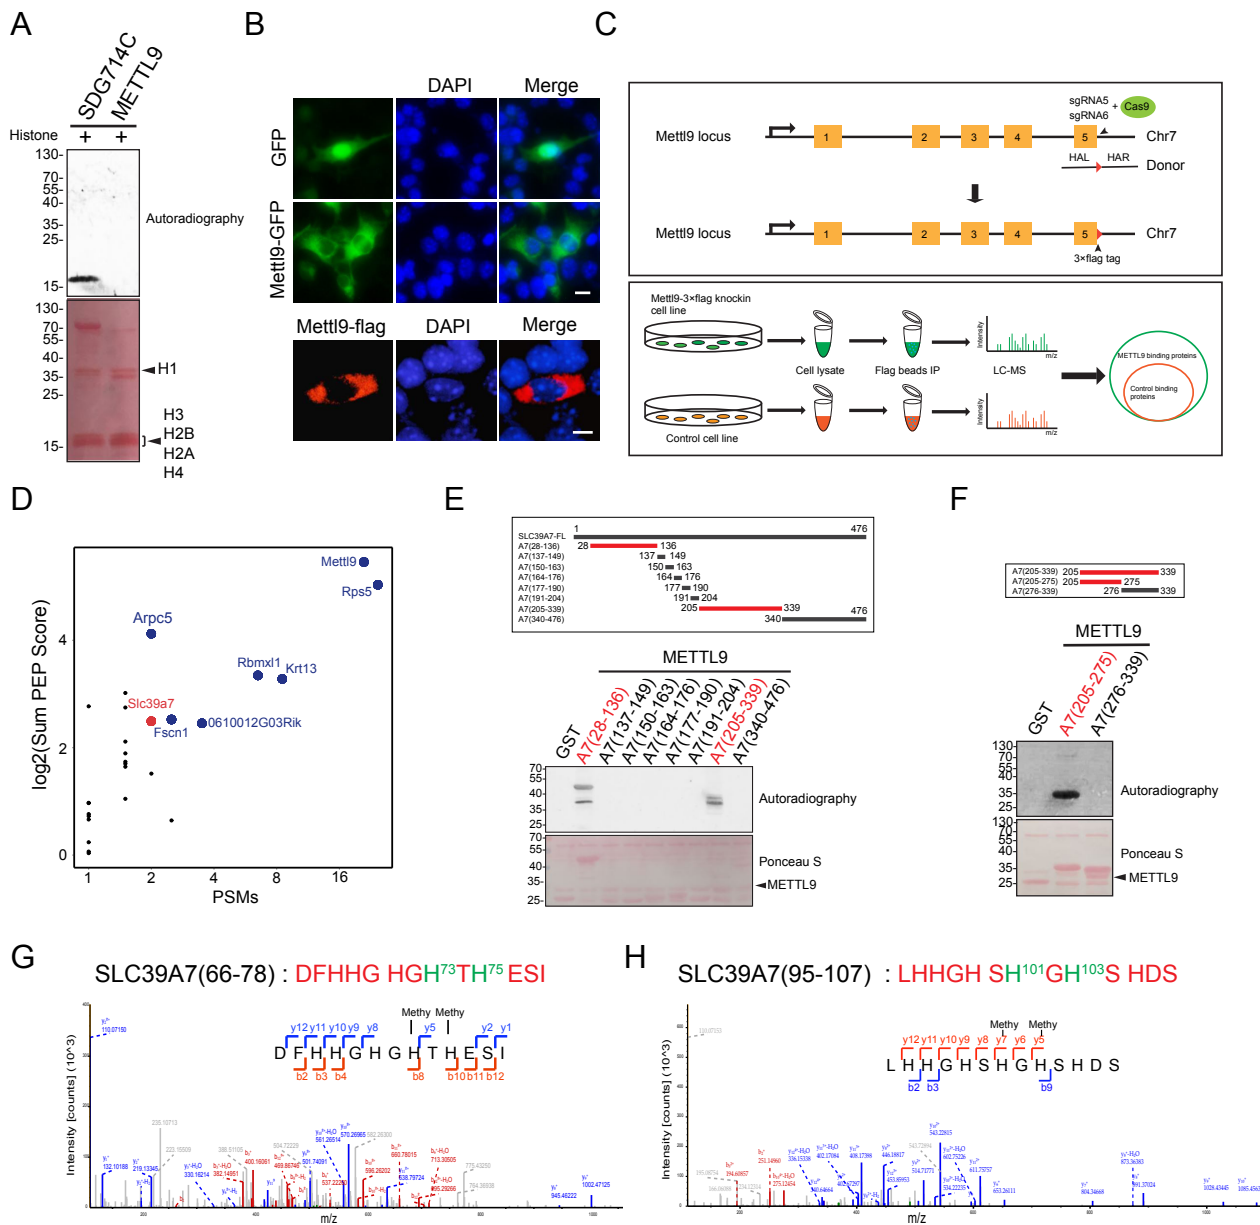

FigureS4

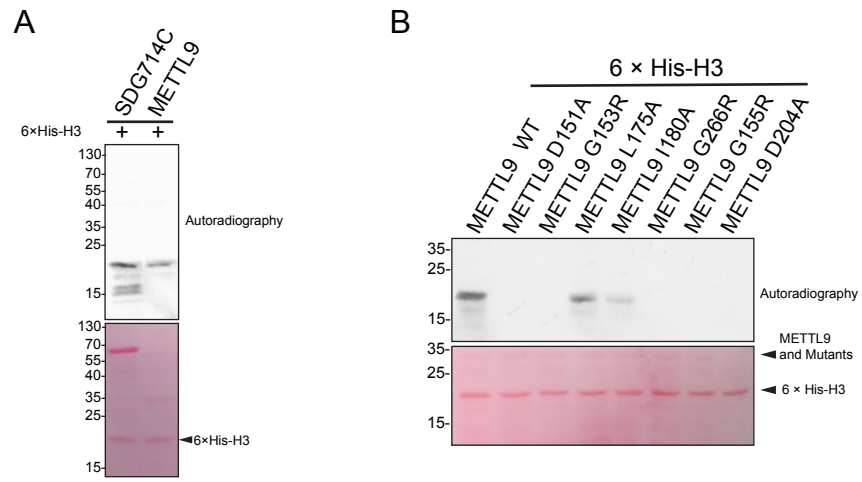

Figure S5

A

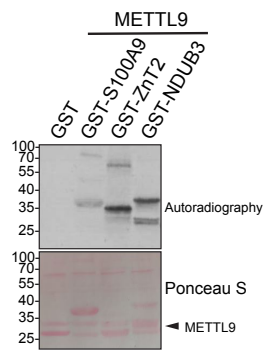

B

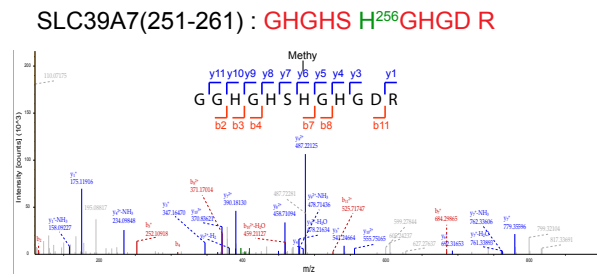

C

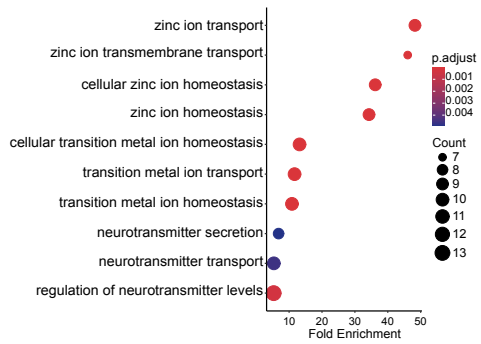

D

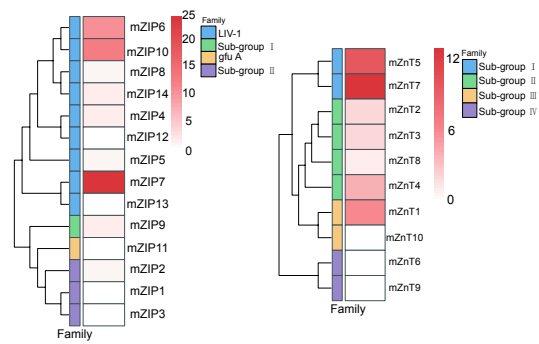

Figure S6

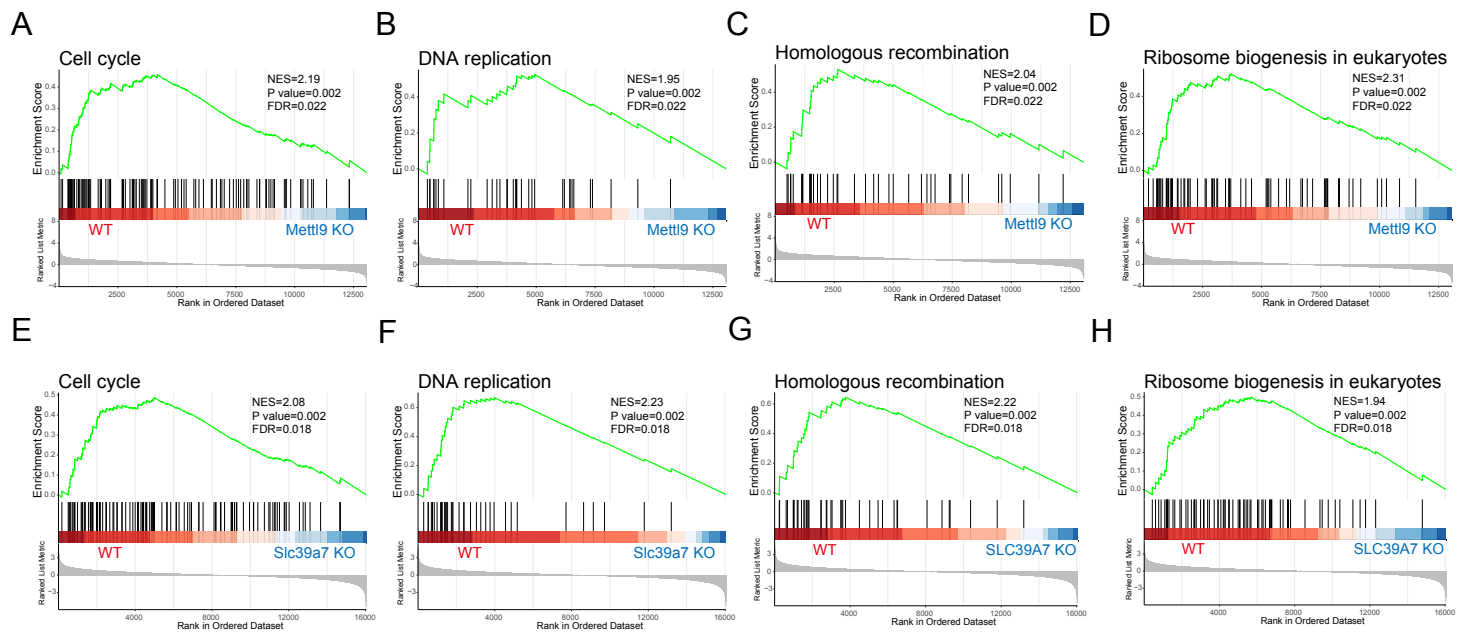

Figure S7

A

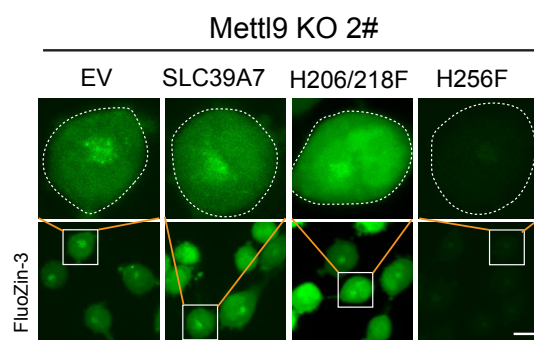

Supplement: 13238_2021_857_MOESM1_ESM.pdf [file 13238_2021_857_MOESM1_ESM.pdf]
